# Supplementary material for: Venetoclax induces rapid elimination of NPM1 mutant measurable residual disease in combination with low‐intensity chemotherapy in acute myeloid leukaemia
Source: PubMed Central journal article supplement — Br J Haematol. 2020 May 26;192(6):1026–30. doi: 10.1111/bjh.16722 (PMC8048658; doi:10.1111/bjh.16722), 2020-05-26

## SUPPLEMENTAL DATA

Supplement to: Tiong IS, et al, Venetoclax induces rapid elimination of *NPM1* mutant measurable residual disease in combination with low intensity chemotherapy in acute myeloid leukaemia.

1. **Supplemental Table S1.** Venetoclax regimen, associated toxicities and dose adjustments.
2. **Supplemental Figure S1.** Proportion of *NPM1*mut MRD response following venetoclax in combination with low-intensity chemotherapy. Five patients (all from cohort 2) did not proceed beyond cycle 2: one patient ongoing post cycle 1 and four patients underwent HSCT (one post cycle 1 and three post cycle 2). Overall molecular response rate was 92% by end of second cycle. Low positive: detectable at >4-log reduction from baseline; positive: detectable at <4-log reduction from baseline.
3. **Supplemental Figure S2.** Kaplan-Meier plots of (A) relapse-free and (B) overall survival for patients treated with venetoclax in combination with low-intensity chemotherapy for molecular persistence (cohort 1) and progression (cohort 2).
4. **Supplementary Figure S3.** Kaplan Meier plot of relapse-free survival for 6 patients with persistent *NPM1*<sup>mut</sup>-MRD in the bone marrow post 4 courses of chemotherapy. Data reproduced from Ivey et al, *N Engl J Med* 2016.
5. **Supplementary Figure S4.** Kaplan Meier plot of relapse-free survival for 27 patients with molecular relapse who received salvage chemotherapy and subsequent allogeneic stem cell transplantation. Data reproduced from Dillon et al, *Blood* 2020.
6. **Case narratives** and serial *NPM1*mut MRD figures for cases #1 to #12.

**Supplemental Table SI.** Venetoclax regimen, associated toxicities and dose adjustments.

| Case # | Venetoclax  | Concurrent azole | Partner therapy                     | No. of Cycles | Grade 4 cytopenias | Dose adjustment                                                                                             | Reason for cessation      |
|--------|-------------|------------------|-------------------------------------|---------------|--------------------|-------------------------------------------------------------------------------------------------------------|---------------------------|
| 1      | 400mg x 28d | No (C5-6)        | Aza 75mg/m <sup>2</sup> x 7d        | 6             | Neut               | Aza x5d in cycle 6<br>Ven 100mg during voriconazole                                                         | Invasive fungal infection |
|        | 400mg x 28d | No               | -                                   | 10            | -                  | -                                                                                                           | Facial rash               |
| 2      | 100mg x 14d | Yes              | LDAC 20mg/m <sup>2</sup> x 7d       | 3+            | Both               | -                                                                                                           | Ongoing                   |
| 3      | 100mg x 14d | Yes              | LDAC 20mg/m <sup>2</sup> x 10d      | 4             | Neut               | Ven x 10d from cycle 3                                                                                      | Planned                   |
| 4      | 100mg x 14d | Yes              | LDAC 20mg/m <sup>2</sup> x 10d      | 4             | Both               | Ven x 10d from cycle 2                                                                                      | Planned                   |
| 5      | 100mg x 14d | Yes              | LDAC 20mg/m <sup>2</sup> x 10d      | 10+           | -                  | Ven x 10d + LDAC x 7d from cycle 7;<br>Ven x 7d + LDAC x 5d from cycle 9                                    | Ongoing                   |
| 6      | 100mg x 14d | Yes              | Aza 75mg/m <sup>2</sup> x 7d        | 4+            | Both               | Aza x 5d from cycle 3 (febrile neutropenia and severe pneumonia requiring admission to intensive care unit) | Ongoing                   |
| 7      | 100mg x 28d | Yes              | LDAC 20mg/m <sup>2</sup> x 10d      | 2             | Both               | Ven x 17d in cycle 2                                                                                        | SCT                       |
| 8      | 100mg x 14d | Yes              | Aza 75mg/m <sup>2</sup> x 5d<br>DLI | 2+            | -                  | -                                                                                                           | Ongoing                   |
| 9      | 100mg x 14d | Yes              | LDAC 20mg/m <sup>2</sup> x 10d      | 2             | -                  | -                                                                                                           | SCT                       |
| 10     | 100mg x 14d | Yes              | LDAC 20mg/m <sup>2</sup> x 10d      | 2             | Both               | Ven x 28d in cycle 2 (increase)                                                                             | SCT                       |
| 11     | 100mg x 14d | Yes              | LDAC 20mg/m <sup>2</sup> x 10d      | 1             | Neut               | -                                                                                                           | SCT                       |
| 12     | 600mg x 28d | No               | LDAC 20mg/m <sup>2</sup> x 10d      | 7+            | -                  | -                                                                                                           | Ongoing                   |

*Abbreviations:* DLI: donor lymphocyte infusion; LDAC: low-dose cytarabine; Neut: neutropenia; SCT: stem cell transplantation.

**Supplemental Figure S1.** Proportion of *NPM1*<sup>mut</sup> MRD response following venetoclax in combination with low-intensity chemotherapy. Five patients (all from cohort 2) did not proceed beyond cycle 2: one patient ongoing post cycle 1 and four patients underwent HSCT (one post cycle 1 and three post cycle 2). Overall molecular response rate was 92% by end of second cycle. Low positive: detectable at >4-log reduction from baseline; positive: detectable at <4-log reduction from baseline.

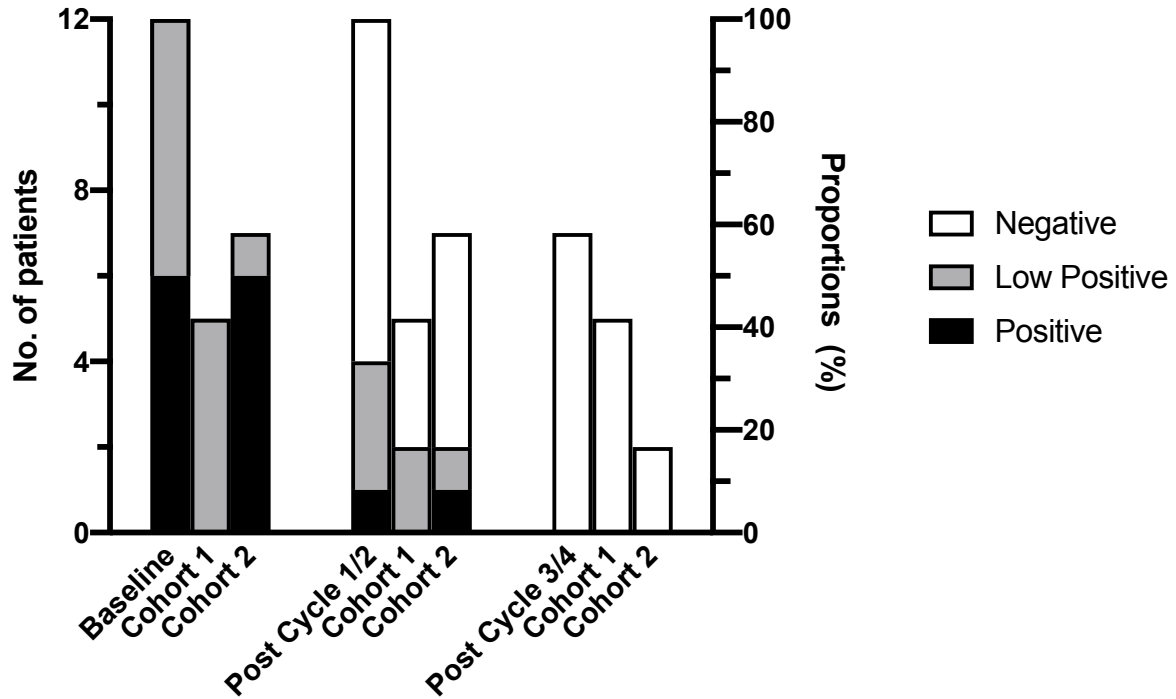

**Supplemental Figure S2.** Kaplan-Meier plots of (A) relapse-free and (B) overall survival for patients treated with venetoclax in combination with low-intensity chemotherapy for molecular persistence (cohort 1) and progression (cohort 2).

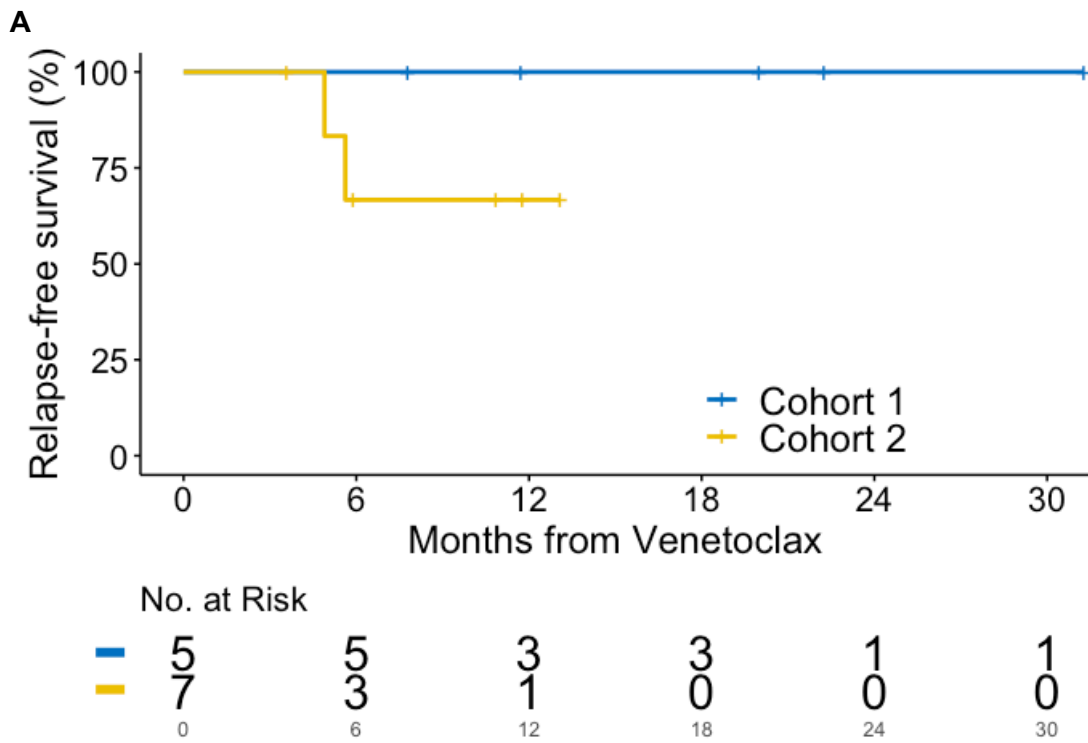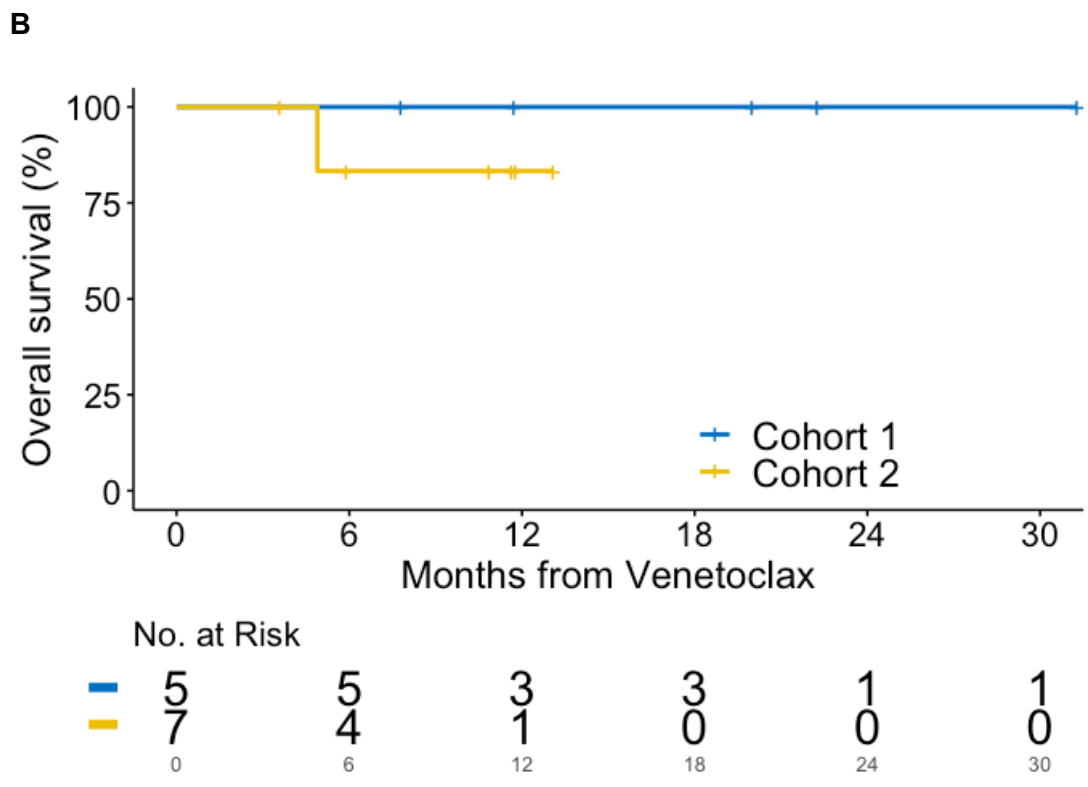

**Supplementary Figure S3.** Kaplan Meier plot of relapse-free survival for 6 patients with persistent *NPM1*<sup>mut</sup>-MRD in the bone marrow post 4 courses of chemotherapy. Data reproduced from Ivey et al, *N Engl J Med* 2016.

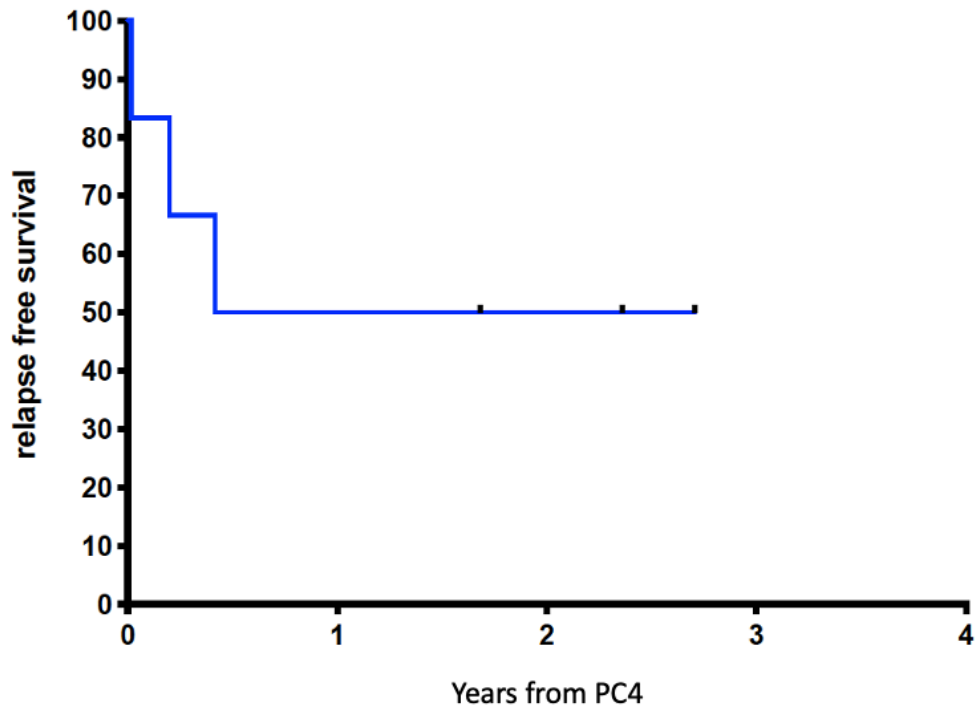

**Supplementary Figure S4.** Kaplan Meier plot of relapse-free survival for 27 patients with molecular relapse who received salvage chemotherapy and subsequent allogeneic stem cell transplantation. Data reproduced from Dillon et al, *Blood* 2020.

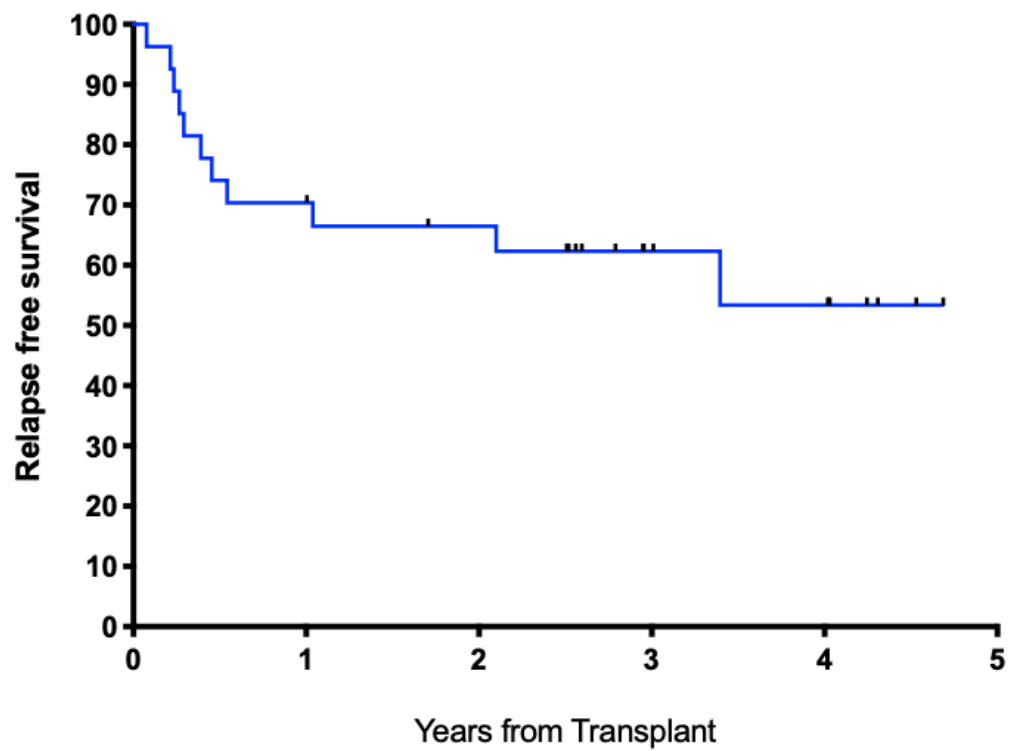

## Case Narratives

### Case #1

A 71-year-old male was diagnosed with AML with a normal karyotype and co-mutations in *DNMT3A*, *TET2* and *FLT3* (N676K). He was treated with DA3+10 then DA3+8. He achieved CR and a 2-log reduction in *NPM1* mutant transcripts after cycle 1. After cycle 2 there was a further 1 log reduction in *NPM1* mutant transcripts in the bone marrow and these were not detected in the peripheral blood. He received intermediate dose cytarabine (1.5mg/m<sup>2</sup> x 6) for cycle 3 with no further reduction in transcript level and subsequently received FLAG-Ida with a 50% dose reduction for cycle 4 after which there was a 0.6 log increase in expression, confirmed on a second sample consistent with molecular persistence of disease.

He then received two cycles of azacitidine + gemtuzumab ozogamicin resulting in a >2-log reduction in transcript levels which remained positive. This treatment was poorly tolerated and was stopped. He then received venetoclax (400mg daily) + azacitidine (75mg/m<sup>2</sup> x 7d), achieving molecular complete remission after the second cycle. He received a further five cycles of venetoclax + azacitidine. The 5<sup>th</sup> cycle was complicated by presumed pulmonary invasive fungal infection requiring admission to hospital. The azacitidine cycle length was reduced to 5 days for the 6<sup>th</sup> cycle. He then received venetoclax monotherapy for a further 10 cycles following which all therapy was stopped due to the development of a pustular skin rash affecting the face which completely resolved within one month of treatment cessation.

At the time of last follow up 31 months after initiation of venetoclax + azacitidine the patient remains alive and well and in ongoing molecular complete remission.

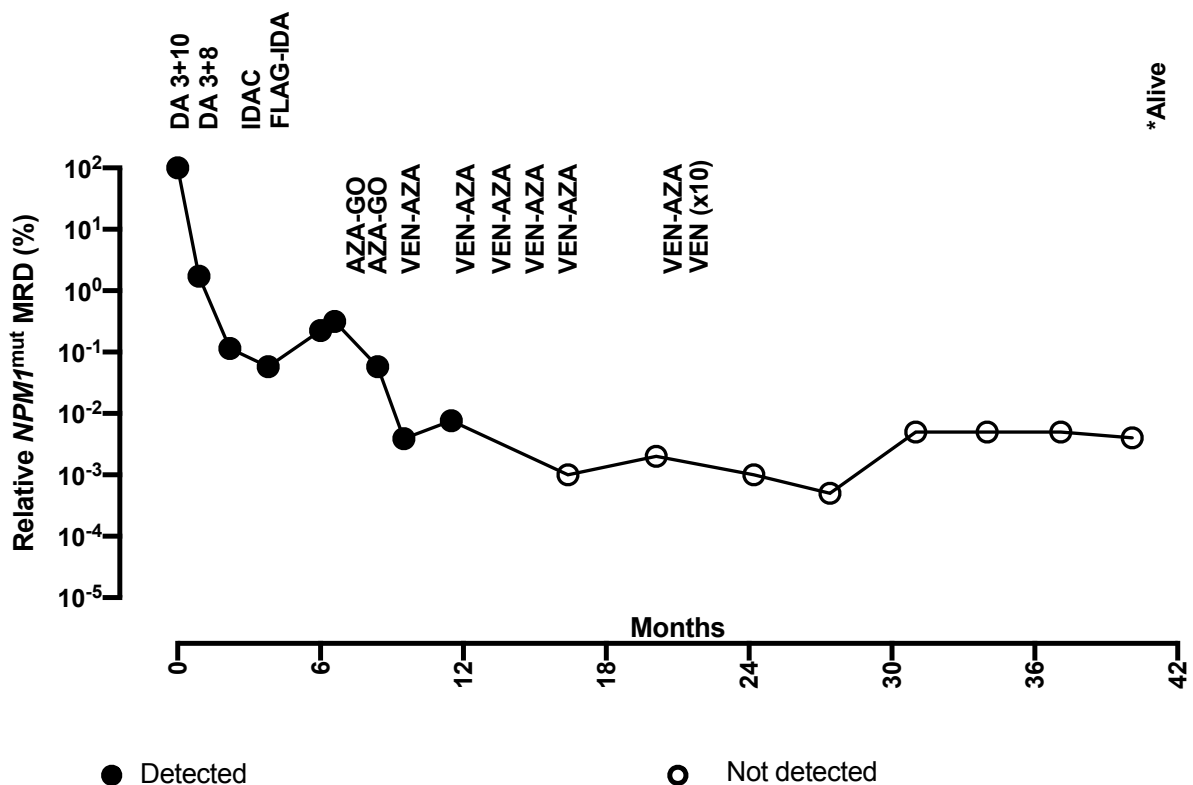

## Case #2

A 79-year-old female was diagnosed with normal karyotype *NPM1* mutated AML. No co-mutations were detected. She entered the NCRI AML18 clinical trial and received induction therapy with DA3+10 which was extremely poorly tolerated with life threatening bacterial and fungal infections and cardiomyopathy presumed secondary to anthracycline exposure. She achieved CR after cycle 1 and there was a 3-log reduction in *NPM1* mutant transcript levels. She received DA2+8 for the second cycle which was reasonably tolerated but there was no further reduction in transcript levels. Consequently, she received intermediate dose cytarabine (1 g/m<sup>2</sup> IV once daily x 5 days) with gemtuzumab ozogamicin for cycle 3 which was complicated by marked derangement in liver function tests. *NPM1* mutant transcripts remained detectable at the end of cycle 3 and treatment with venetoclax (100 mg once daily x 14 days with posaconazole) + cytarabine (20 mg/m<sup>2</sup>/d x 7 days by continuous infusion) was initiated. This was well tolerated without infection or hospitalisation. Molecular complete remission was achieved after the first cycle and at the time of last follow-up she had received two further cycles with a plan for ongoing therapy.

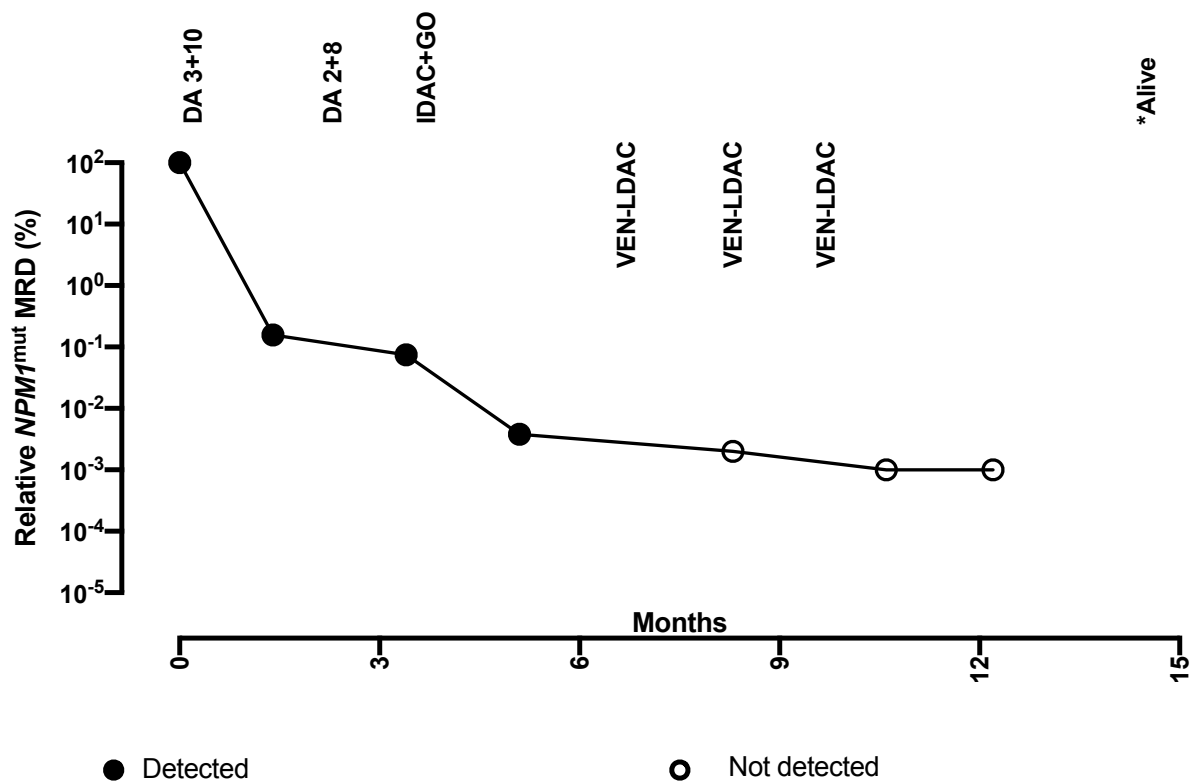



### Case #3

A 67-year-old female was diagnosed with pancytopenia and leucoerythroblastic blood picture. Bone marrow was hypercellular with 9.4% blasts, dysplastic changes with MF-2 reticulin fibrosis, consistent with an MDS/MPN syndrome. Molecular panel demonstrated *NPM1* and *DNMT3A* Met880Val mutations. Patient was treated as AML with 7+3 induction (2.6 log reduction) and 2 cycles of IDAC+2 consolidation (persistent low positive levels at end of therapy). Best response was CR with incomplete platelet recovery (CRp).

She then received 4 cycles of venetoclax (100 mg once daily x 14 days with posaconazole) with low-dose cytarabine, with successful eradication of *NPM1* mutant transcripts. In addition, patient made full hematologic recovery (CR). Treatment course was complicated by oral ulcers but otherwise well tolerated. Patient remained well at 22.2 months post venetoclax initiation.

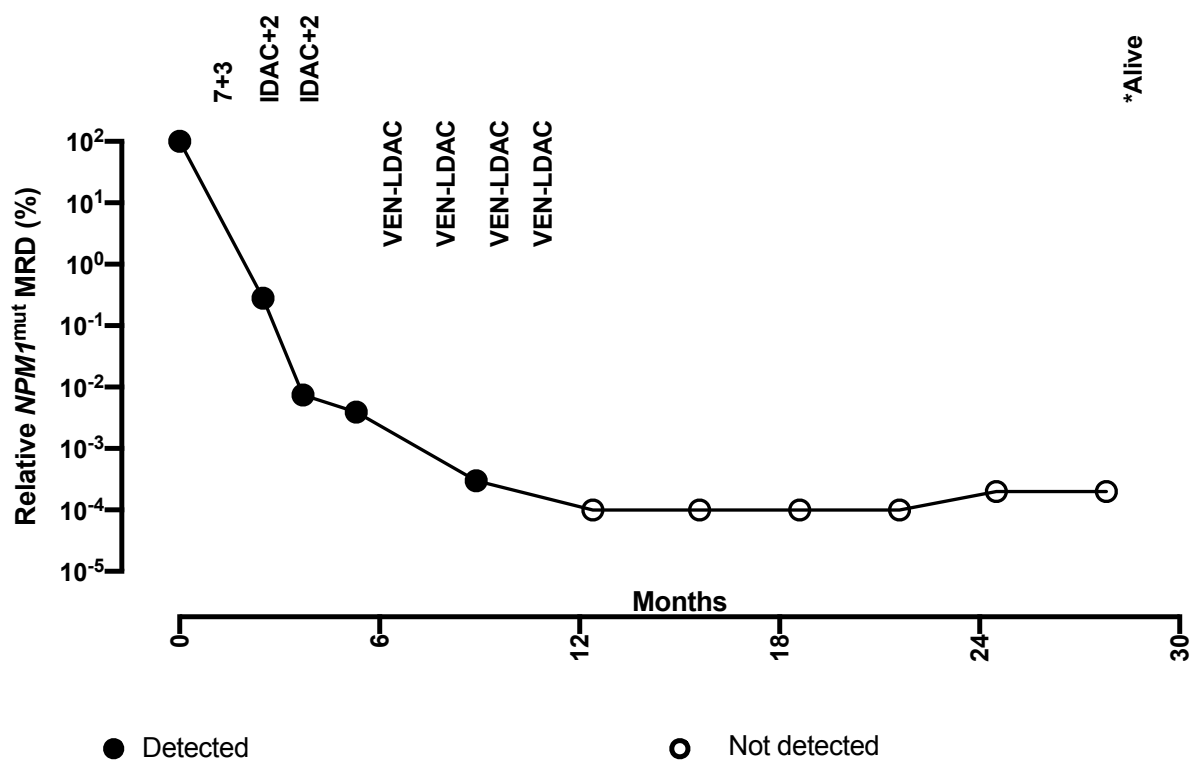

### Case #4

A 61-year old female was diagnosed with normal karyotype AML with mutations in *NPM1* and *IDH2-R140*. This was treated with 7+3 induction with a 4.2-log reduction. However, following further 2 cycles of IDAC+2 consolidation, *NPM1* mutant transcript persisted at low copy numbers. She then received 2 cycles of venetoclax (100 mg once daily x 14 days with posaconazole) with low-dose cytarabine. *NPM1* mutant MRD was eradicated following two cycles of therapy and patient went on to receive two further cycles. She remained well at 20 months post VEN initiation.

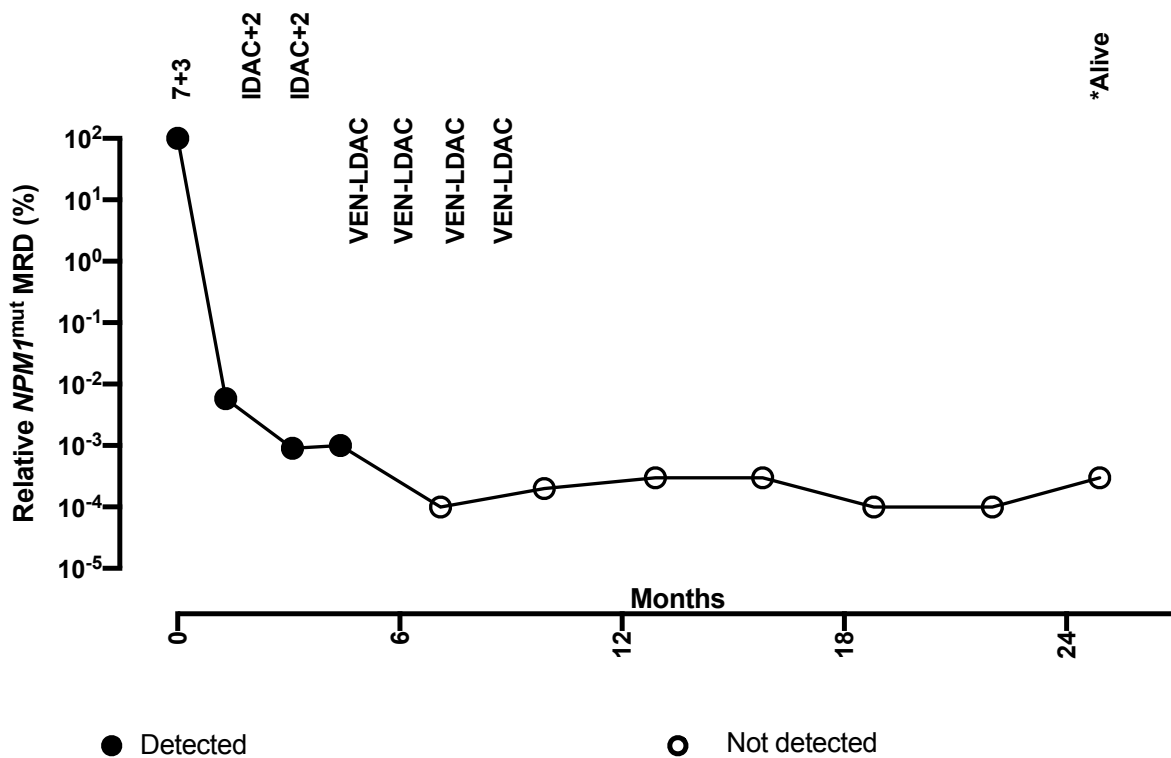

## Case #5

A 62-year-old male presented with WCC > 100 x 10<sup>9</sup>/L and diagnosed with AML: trisomy 21, and mutated *NPM1*, *FLT3* Asp839Glu, *DNMT3A* Arg882Cys, *TET2* Arg1354fs and *TET2* Arg1440fs. Induction (7+3 with midostaurin) was complicated by tumour lysis syndrome, oliguric acute kidney injury requiring renal replacement therapy, methicillin-sensitive *Staphylococcal aureus* sepsis, and intensive care admission. Complete remission was achieved post induction with a 4-log reduction in *NPM1*<sup>mut</sup> MRD level.

Patient was deemed unfit for further consolidation chemotherapy, but instead was commenced on venetoclax (100 mg once daily x 14 days with posaconazole) with low-dose cytarabine, at 65 days post induction. *NPM1*<sup>mut</sup> MRD was rendered negative following first cycle of therapy. Post cycle 3 patient was hospitalised for viral upper respiratory tract infection and deranged liver biochemistry. A low level *NPM1*<sup>mut</sup> MRD was also noted. Posaconazole was ceased from cycle 4-6 and venetoclax increased to 400 mg once daily. Cycle 7 onwards, itraconazole was initiated and venetoclax dose reduced back to 100 mg once daily. Subsequent MRD levels were undetectable and patient remained well with ongoing therapy (cycle 10+).

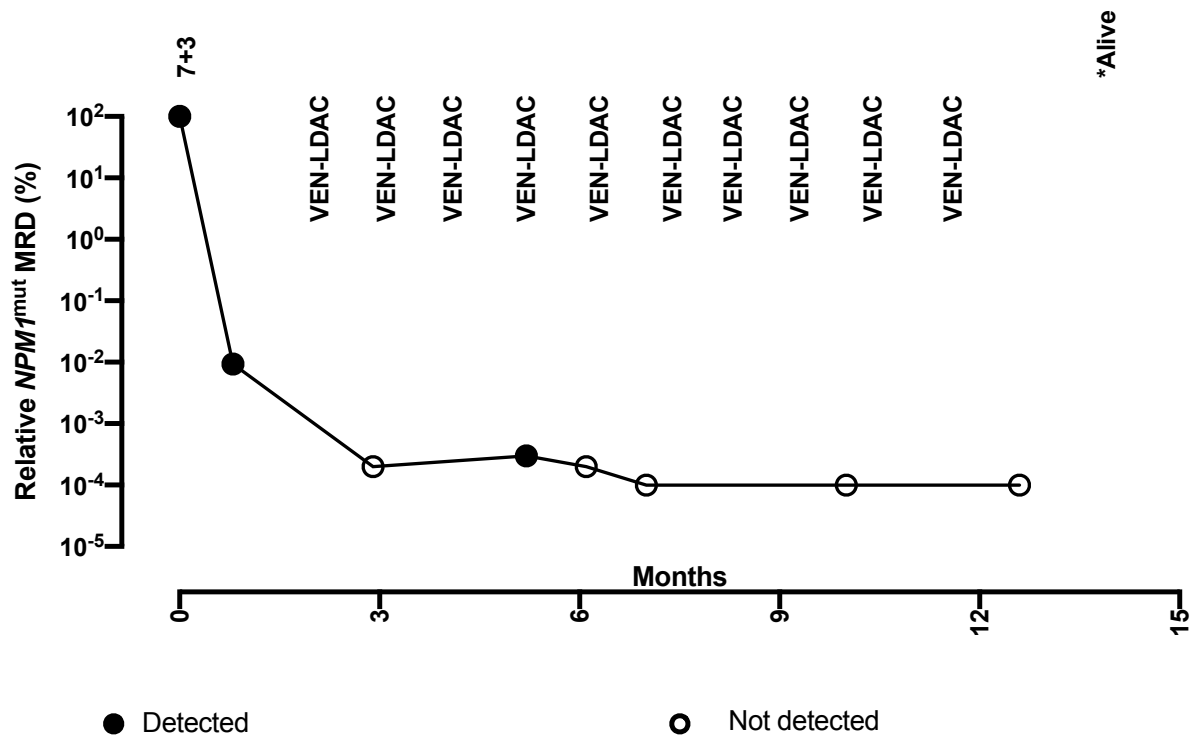

## Case #6

An 80-year-old male was diagnosed with AML with normal karyotype and co-mutations in *IDH1* (R132C) *FLT3* (D835E) and *SRSF2* (P95R). He entered the NCRI AML18 clinical trial and received induction therapy with DA3+10 with two doses of gemtuzumab ozogamicin. He achieved a morphological and molecular complete remission after cycle 1 and received DA3+8 for cycle 2 which was complicated by severe mucositis leading to the decision to withhold further treatment.

One year after his initial diagnosis, two consecutive bone marrow samples tested positive for *NPM1* mutant transcripts with a rising level and he was diagnosed with molecular relapse. He was treated with azacitidine monotherapy which resulted in an initial reduction in transcript levels which subsequently reached a plateau. He then commenced treatment with venetoclax (100mg od with posaconazole x 14d) + azacitidine (75mg/m<sup>2</sup> x 7d), achieving a molecular complete remission after the first cycle. The second cycle was complicated by neutropenic sepsis and severe pneumonia requiring intensive care admission for non-invasive ventilation. The length of azacitidine was reduced to 5 days for subsequent cycles and these were well tolerated. At last follow-up 11.8 months after initiation of venetoclax treatment, the patient remains alive and well in molecular complete remission with a plan for ongoing treatment.

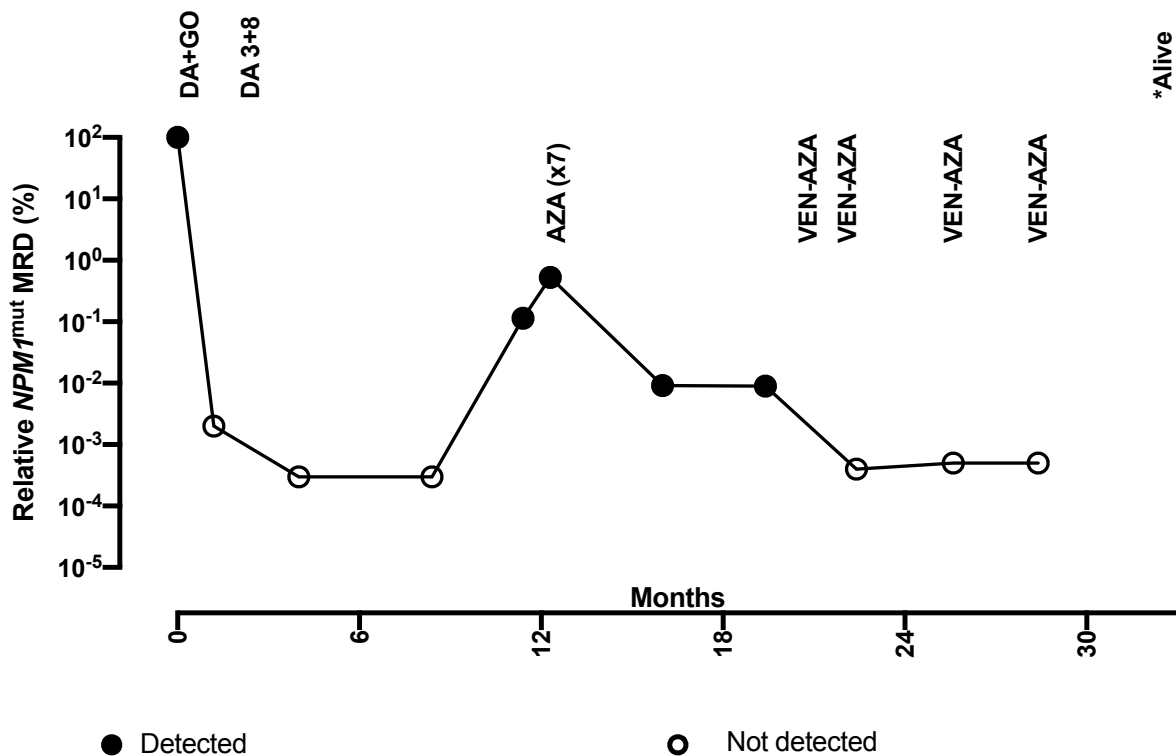

### Case #7

A 40-year-old female was diagnosed with AML with a normal karyotype and mutations in *NPM1* and *FLT3* (D835Y). She entered the NCRI AML19 clinical trial and received induction therapy with DA3+10 and one dose of gemtuzumab ozogamicin. This was complicated by eosinophilic myocarditis thought to be caused by the gemtuzumab ozogamicin. She achieved CR after the first cycle with a 3.4 log reduction in *NPM1* mutant transcript levels and received consolidation with 3 cycles of high dose cytarabine (3 g/m<sup>2</sup> x 6). At the end of treatment, MRD assessment showed a 1.9 log increase in transcript levels consistent with molecular progression. She received FLAG-IDA as salvage therapy; this was poorly tolerated with life-threatening infection and on regeneration there had been no reduction in transcript levels. She then received venetoclax (100 mg od x 28d + posaconazole) + cytarabine (20 mg/m<sup>2</sup>/d x 10d) and achieved complete molecular remission, grade 4 neutropenia and thrombocytopenia but no infection. Second cycle of therapy was continued without waiting for neutrophil and platelet recovery to grade <4, with venetoclax ceased at day 18. She went on to receive HSCT and MRD assessment pre-transplant and at D+30 showed ongoing molecular complete remission. Unfortunately, she was readmitted with sepsis after transplant having fully engrafted and subsequently died.

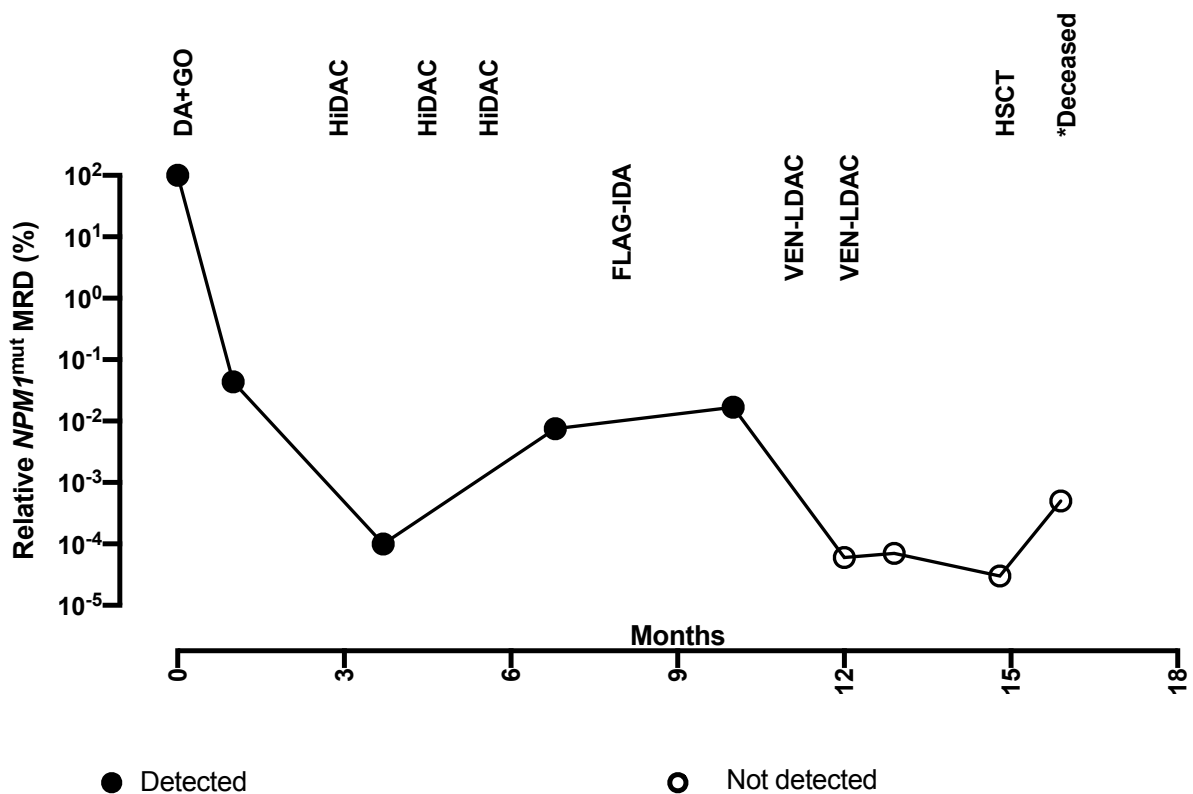

## Case #8

A 28-year-old man presented with relapsed AML 7 years after his original diagnosis, having originally presented in 2012 with AML with fibrosis and an *NPM1* mutation. At relapse, in addition to persistent *NPM1*, he was also found to harbour a *FLT3* TKD (D835) mutation. He received two cycles of FLAG-IDA salvage therapy resulting in CR and a 3-log reduction in transcript levels. Post allogeneic HSCT, the D+100 bone marrow MRD assessment was positive. Despite withdrawal of immunosuppression and donor lymphocyte infusion (DLI;  $10^6$  cells), *NPM1*<sup>mut</sup> levels increased in two consecutive samples consistent with molecular progression. Venetoclax (100 mg od x 14d) + azacitidine (75mg/m<sup>2</sup> for 5 days) was given resulting in molecular complete remission after one cycle of therapy in conjunction with DLI ( $10^6$  cells). Venetoclax and azacitidine was well tolerated without grade 4 cytopenias, infection or hospital admission. Second cycle was delivered with DLI  $4.7 \times 10^6$  cells. The patient remains alive and well with a plan for ongoing therapy.

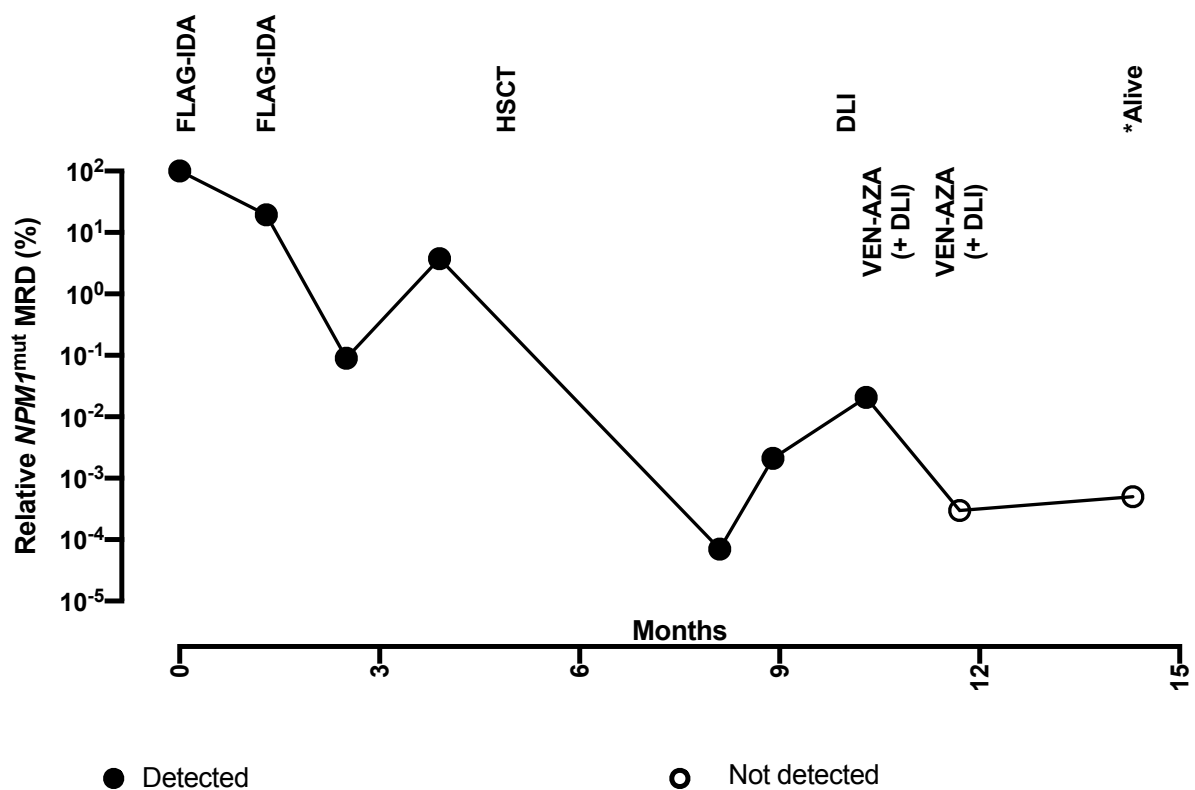

### Case #9

A 52-year-old male was diagnosed with AML with normal karyotype and mutated *NPM1* (no other co-mutations). He achieved excellent response following IDAC+3 induction (cytarabine 1.5 g/m<sup>2</sup> x 8 and idarubicin 12 mg/m<sup>2</sup> x3) with a 4.4-log reduction in *NPM1*<sup>mut</sup> MRD, and molecular complete remission after an IDAC+2 consolidation (cytarabine 1 g/m<sup>2</sup> x6 and idarubicin 12 mg/m<sup>2</sup> x2). During surveillance, *NPM1*<sup>mut</sup> transcript levels were noted to be rising after 9 months post CR and peaked at 14% (~13 months post CR). Venetoclax (100 mg x 14d with posaconazole) and low-dose cytarabine were initiated with 4.2 log reduction post 1<sup>st</sup> cycle and molecular complete remission post 2<sup>nd</sup> cycle. Patient underwent allogeneic HSCT and remained alive at 9.9 months post HSCT.

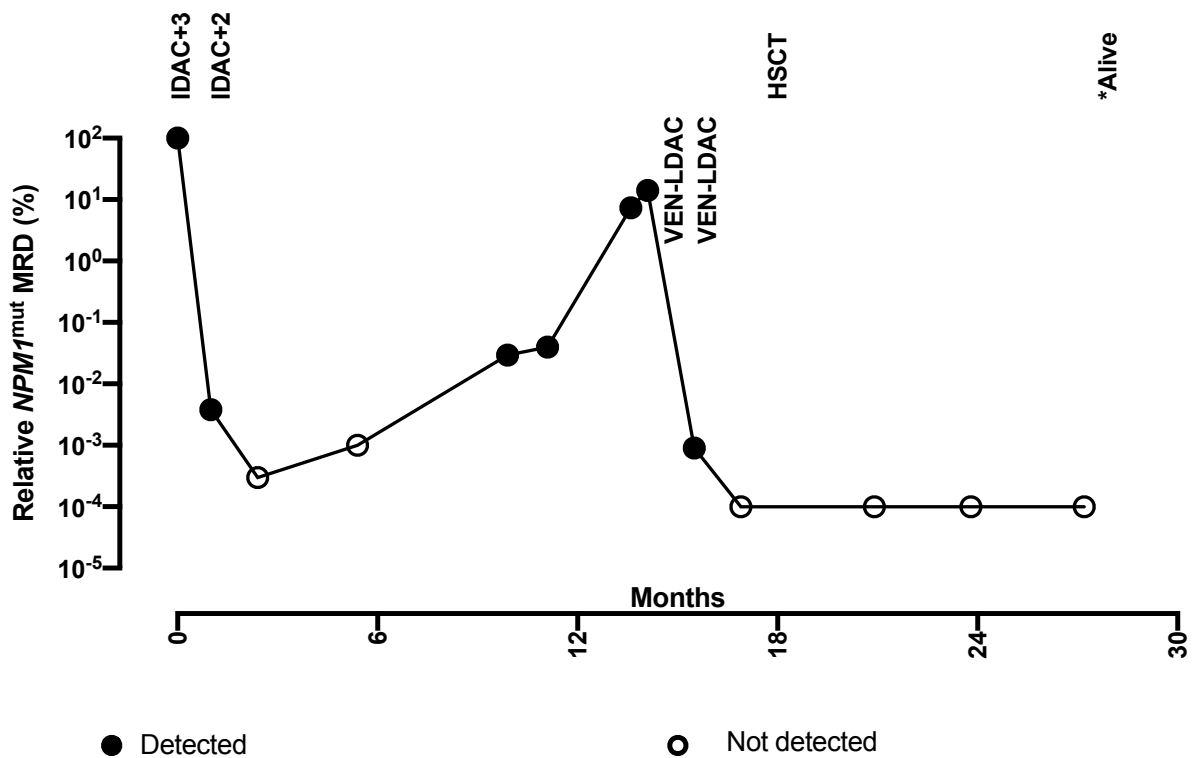

## Case #10

A 35-year-old female was diagnosed with AML with normal karyotype, mutated *NPM1*, *IDH2* R140 and *DNMT3A* R882. Post induction (7+3) response was suboptimal (2.2 log reduction), followed by three cycles of HiDAC consolidation (3 g/m<sup>2</sup> x 6) with persistent low copy numbers at approximately 3.5 log from baseline levels. Two months following completion of chemotherapy, molecular progression was evident. Two cycles of venetoclax (100 mg x 14d during cycle 1 and x 28d during cycle 2) with low-dose cytarabine were attempted with minimal response (0.6 log reduction). Patient went to have a myeloablative allogeneic HSCT but relapsed 78 days post HSCT with a newly acquired *FLT3*-ITD at allelic ratio 0.09. Baseline mutations (*NPM1*, *IDH2* and *DNMT3A*) were all persistent at the time of relapse. She was subsequently treated with gilteritinib.

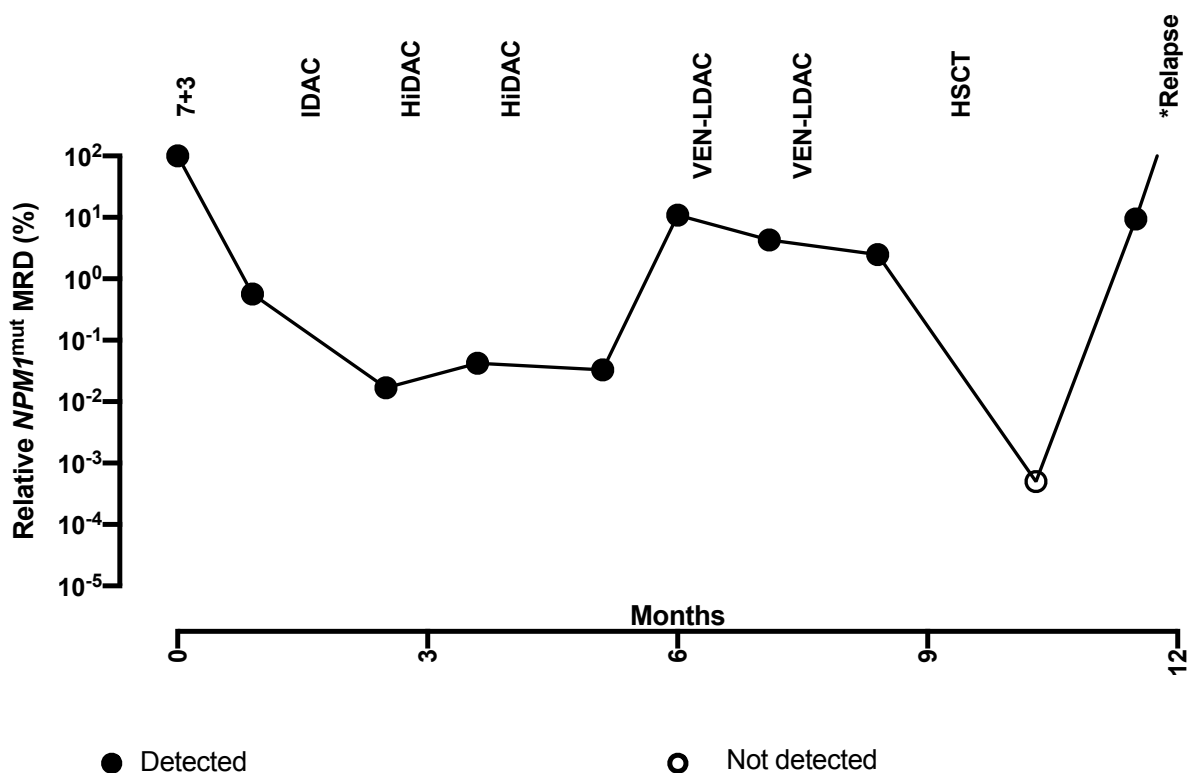



## Case #11

A 51-year-old male was diagnosed with AML with normal karyotype, *FLT3*-ITD (allelic ratio 0.32) and mutated *NPM1*. He entered ALLG AMLM16 trial and underwent induction with IDAC+3 (cytarabine 1.5 g/m<sup>2</sup> x8 and idarubicin 12 mg/m<sup>2</sup> x3) and sorafenib/placebo. Post induction assessment revealed CR with a 4.1-log reduction in *NPM1*<sup>mut</sup> MRD. This was followed by two cycles of IcE consolidation (idarubicin 9 mg/m<sup>2</sup> x2, cytarabine 100 mg/m<sup>2</sup> x5 and etoposide 75 mg/m<sup>2</sup> x5), with persistent low copy numbers of *NPM1*<sup>mut</sup> transcripts.

*NPM1*<sup>mut</sup> MRD was initially stable during surveillance but molecular progression occurred at six months post completion of chemotherapy. After one cycle of venetoclax (100 mg x 14d with posaconazole) and low-dose cytarabine, *NPM1*<sup>mut</sup> MRD was rendered undetectable and patient underwent reduced intensity conditioning HSCT. He remained alive and well at 8.9 months post HSCT.

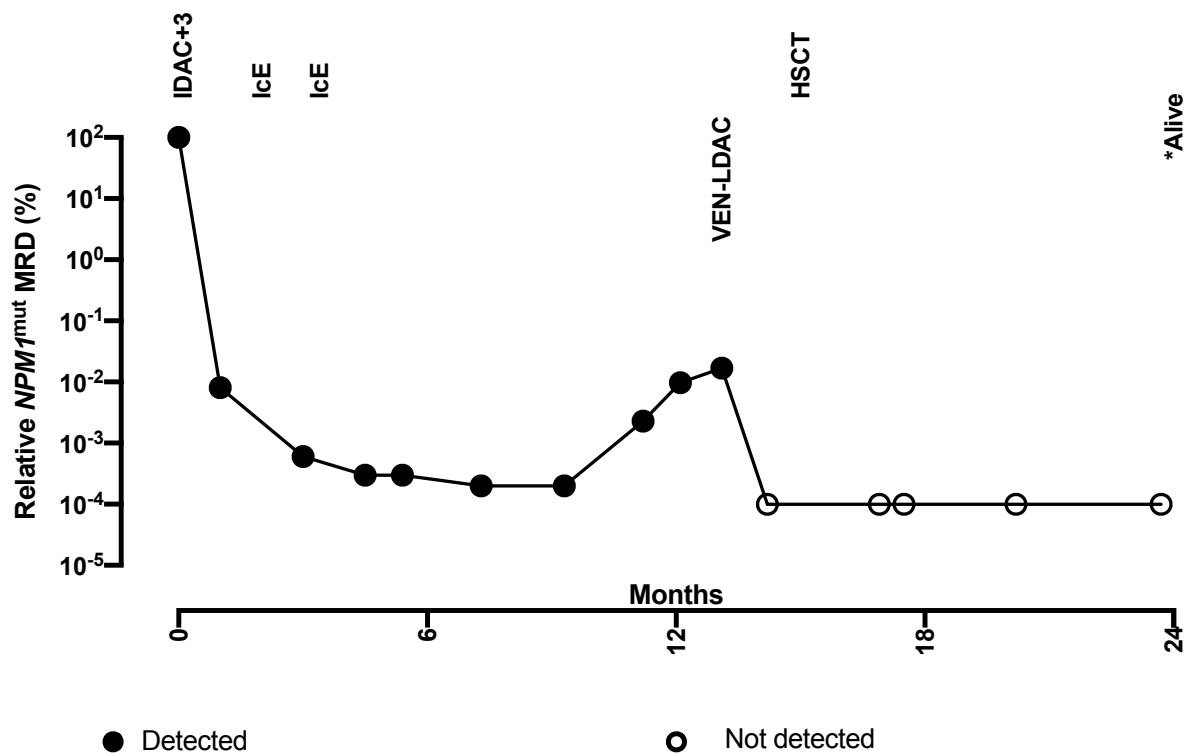

## Case #12

A 69-year-old male was diagnosed with AML with normal karyotype, mutated *NPM1* and *DNMT3A* R882. Post induction (7+3) response was suboptimal (2.8 log reduction), followed by two cycles of IDAC+2 consolidation (cytarabine 1 g/m<sup>2</sup> x 6 and idarubicin 12 mg/m<sup>2</sup> x2) with persistent low copy numbers at end of therapy.

*NPM1*<sup>mut</sup> transcript levels were initially stable but molecular progression ensued eight months post completion of chemotherapy, followed shortly by early morphological relapse (5% bone marrow blasts) 3.1 months later. Patient entered a clinical trial receiving venetoclax in combination with a MCL1 inhibitor and achieved a 2.1-log MRD reduction but was withdrawn after one cycle due to toxicity. He subsequently received venetoclax (600 mg once daily x28d) and low-dose cytarabine, with a further 2.6-log reduction after one cycle and achieved molecular complete remission after 3 cycles. Patient remained on therapy (7+ cycles) and well at last follow up.

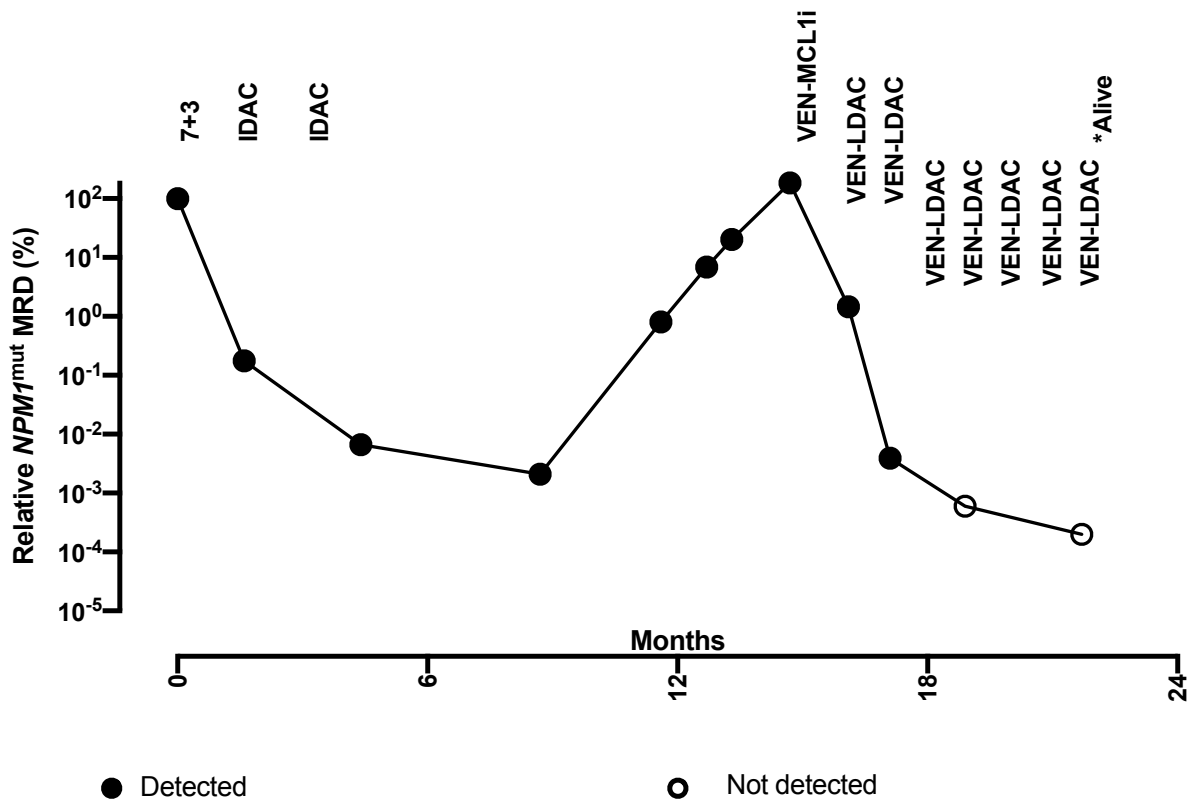

Supplement: BJH-192-1026-s001.pdf [file BJH-192-1026-s001.pdf]
